# Supplementary material for: Gut microbiota mediate caffeine detoxification in the primary insect pest of coffee
Source: PubMed Central journal article supplement (PMC4510693; doi:10.1038/ncomms8618), 2015-07-14
Supplement: ncomms8618-s1.pdf [file ncomms8618-s1.pdf]

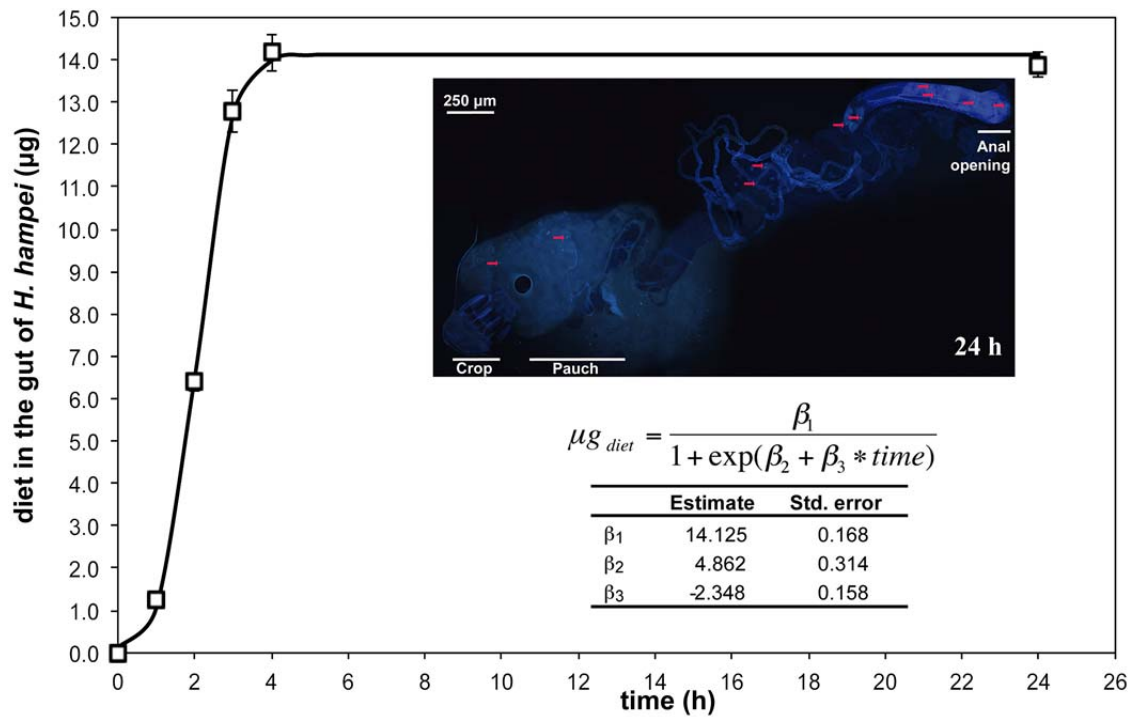

**Supplementary Figure 1:** Measurement and modeling of the transit of diet through the alimentary canal of *H. hampei*. Insect's guts (n=4) were screened for fluospheres at every given time. Error bars represent the standard error. Counts were fitted using a non-linear least squares (NLS) regression to calculate the feeding rate. An example image of a gut extracted at 24 h of feeding incubation is included.

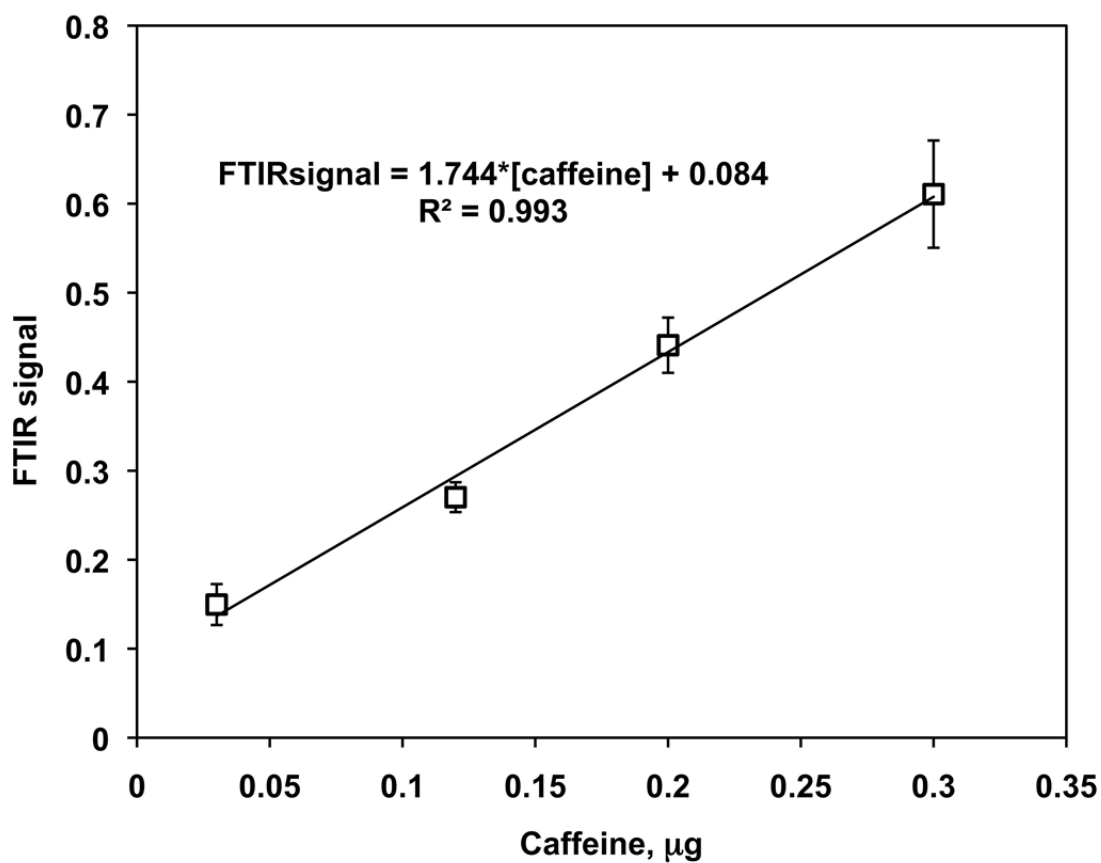

**Supplementary Figure 2. Calibration of FTIR signatures for caffeine detection and quantification in the frass of *H. hampei* using pure caffeine standards.** The area of the two major infrared adsorption peaks ( $\sim 1655$  and  $\sim 1705$   $\text{cm}^{-1}$ ) for caffeine was calculated for known amounts of the alkaloid. Error bars are the standard error of the measurements.

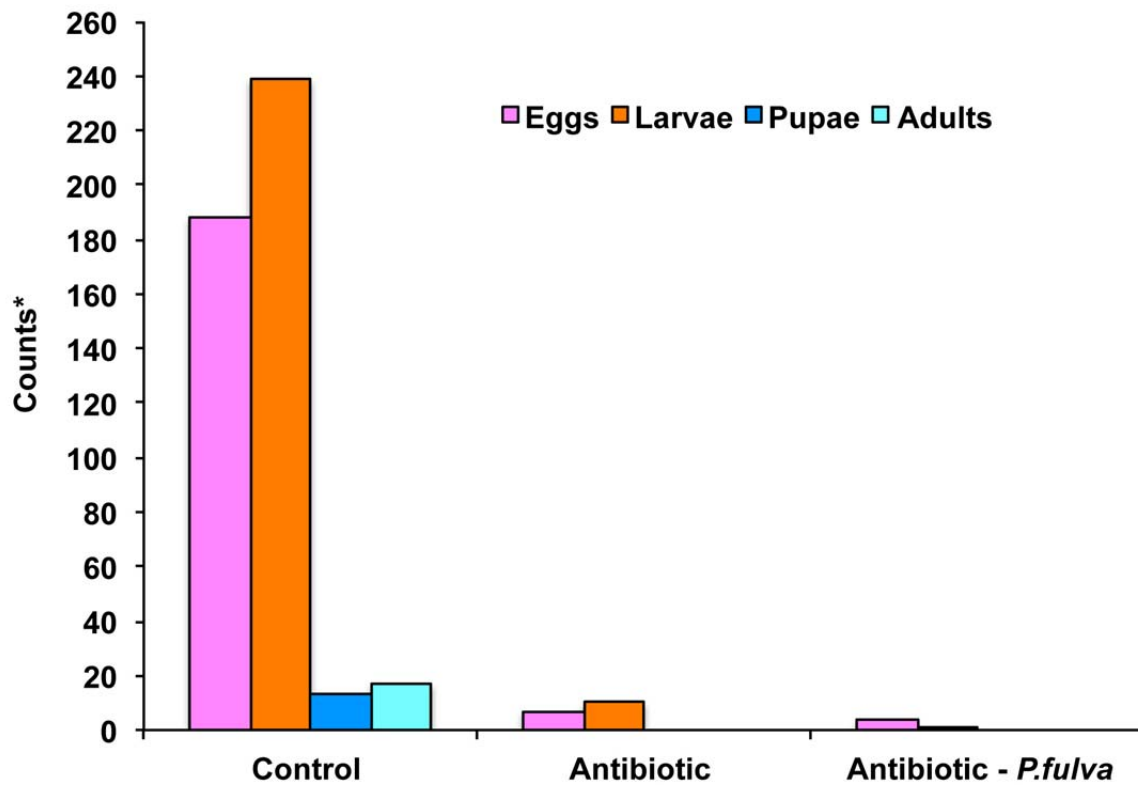

**Supplementary Figure 3. Reproductive fitness of insects after reduction of their microbiome.** The factor treatment (control and antibiotic) showed a significant effect on the reproduction of *H. hampei*. A logistic regression was performed on the sum of all stages in each vial. Then a model was fit with just the main effects (control and antibiotics, and sampling time). \*Counts correspond to the accumulated values of each screened developmental stage (egg, larvae, pupae, adult) after incubating for 45 days.

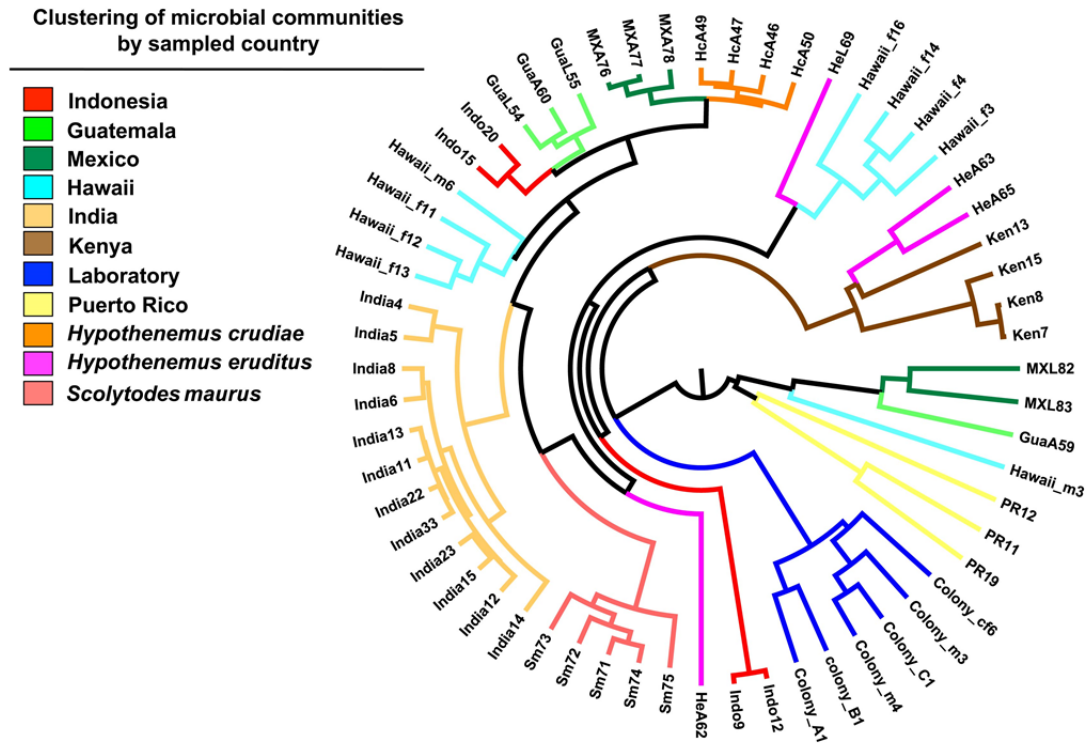

**Supplementary Figure 4. Clustering of bacterial communities from *H. hampei* specimens and other non-coffee berry boring bark beetles collected from multiple coffee producing countries.** Distances were determined using the weighted unifracc distance metric and dendrograms clustering performed with Unweighted Pair Group Method with Arithmetic mean clustering. All branches have a support > 60%.

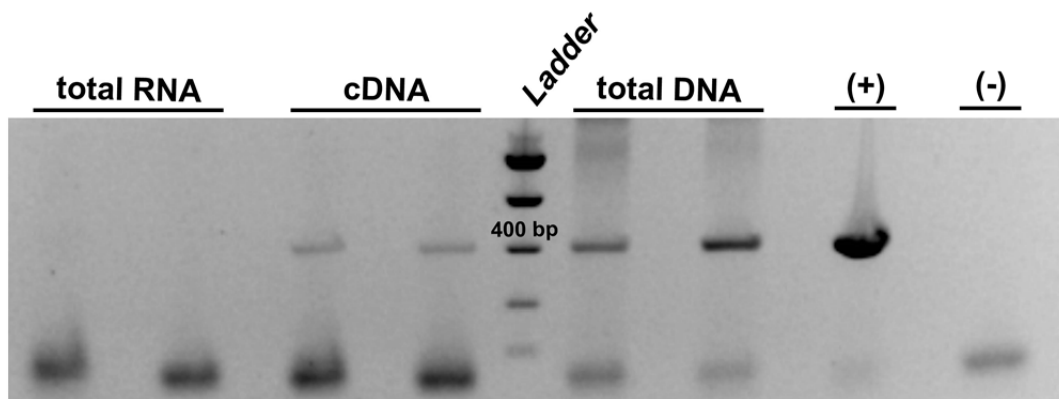

**Supplementary Figure 5. Expression of the *ndmA* gene in field specimens of *H. hampei*.** Electrophoresis of the amplification products for the different templates used for the RT-qPCR of the *ndmA* gene. Total RNA and DNA were co-extracted and separated. No amplification product is detected for the total RNA indicating the no contamination of RNA with DNA. A band of ~400 bp is obtained for both the cDNA and DNA. (+) Shows the amplification product from the DNA of *P. fulva*. (-) RT-qPCR non-template control.
